# Supplementary material for: Regulation of nitrous oxide production in low oxygen waters off the coast of Peru
Source: Copernicus journal article supplement (doi:10.5194/bg-2019-476), 2019-12-09
Supplement: Supplementary file 1 [file bg-2019-476-supplement.pdf]

Supplements

**Regulation of nitrous oxide production in low oxygen waters  
off the coast of Peru**

- 5 Claudia Frey<sup>1,2,\*</sup>, Hermann W. Bange<sup>2</sup>, Eric P. Achterberg<sup>3</sup>, Amal Jayakumar<sup>1</sup>, Carolin R. Löscher<sup>4</sup>, Damian L. Arévalo-Martínez<sup>2</sup>, Elizabeth León-Palmero<sup>5</sup>, Mingshuang Sun<sup>2</sup>, Ruifang C. Xie<sup>3</sup>, Sergey Oleynik<sup>1</sup>, Bess Ward<sup>1</sup>

**Table S1:** Average alpha diversities of total and active archaeal *amoA* and *nirS* communities.

|             | <i>nirS</i> | <i>amoA</i> |
|-------------|-------------|-------------|
| <b>DNA</b>  | 3.8 ± 0.4   | 3.6 ± 0.1   |
| <b>cDNA</b> | 3.4 ± 0.5   | 3.2 ± 0.3   |

**Table S2:** Overview of abundant archetypes (> 1%) that are significantly enriched in respective O<sub>2</sub> levels (Lefse analysis). O<sub>2</sub> levels were split in 3 categories: anoxic (<1 μmol L<sup>-1</sup> O<sub>2</sub>, Seabird O<sub>2</sub> and Winkler titration detection limits), hypoxic (1 – 10 μmol L<sup>-1</sup> O<sub>2</sub>), oxic (> 10 μmol L<sup>-1</sup> O<sub>2</sub>).

| <i>amoA</i> | archetype | anoxic | hypoxic | oxic | <i>nirS</i> | archetype | anoxic | hypoxic | oxic |
|-------------|-----------|--------|---------|------|-------------|-----------|--------|---------|------|
| DNA         | AOA3      |        |         | x    | DNA         | nir4      |        |         | x    |
|             | AOA7      | x      |         |      |             | nir14     |        |         | x    |
|             | AOA78     |        |         | x    |             | nir23     | x      |         |      |
|             | AOA83     |        |         | x    |             | nir46     | x      |         |      |
|             |           |        |         |      |             | nir166    | x      |         |      |
| cDNA        | AOA3      |        |         | x    | cDNA        | nir4      |        |         | x    |
|             | AOA7      |        | x       |      |             | nir14     |        |         | x    |
|             | AOA83     |        |         | x    |             | nir23     | x      |         |      |
|             |           |        |         |      |             | nir141    |        |         | x    |
|             |           |        |         |      |             | nir166    | x      |         |      |

**Table S3:** All samples with rates, standard errors, fraction label ( $f_N$ ), yields, copy numbers mL<sup>-1</sup> of *nirS* and *amoA* genes and transcripts.

| sample ID | station | depth (m) | oxygen (μM) | $f_{NH4+}$ | $f_{NO2-}$ | $f_{NO3-}$ | N2O pro (nM/d) NH4+ | SE    | %hybrid from total N2O | NH4 <sub>oxd</sub> (nM/d) | N2O Yield (%) NH4+ | SE yield | N2O pro (nM/d) NO2- | SE   | NO3 <sup>-</sup> reduction (nM/d) | SE    | N2O Yield (%) NO3 <sup>-</sup> | N2O pro (nM/d) NO3 <sup>-</sup> | SE     | %hybrid from total N2O | N2O pro (nM/d) NO3 <sup>-</sup> | SE     | N2O Yield (%) NO3 <sup>-</sup> | SE        | NO3 <sup>-</sup> reduction (nM/d) | SE       | nirS gene copy numbers* mL <sup>-1</sup> | SE     | nirS transcript copy numbers* mL <sup>-1</sup> | SE     | amoA gene copy numbers* mL <sup>-1</sup> | SE    | amoA transcript copy numbers* mL <sup>-1</sup> | SE |  |
|-----------|---------|-----------|-------------|------------|------------|------------|---------------------|-------|------------------------|---------------------------|--------------------|----------|---------------------|------|-----------------------------------|-------|--------------------------------|---------------------------------|--------|------------------------|---------------------------------|--------|--------------------------------|-----------|-----------------------------------|----------|------------------------------------------|--------|------------------------------------------------|--------|------------------------------------------|-------|------------------------------------------------|----|--|
| 51        | 882     | 298       | 0.2         | 0.98       | 0.45       | 0.058      | 0.0                 | 0.002 | -                      | 0.89                      | 0.22               | 0.00     | 0.04                | 0.00 | 0.39                              | 7.20  | 1.7                            | 42.53                           | 2.67   | 0.00                   | 0.00                            | 0.00   | 0.00                           | 0.00      | 0.28                              | 412319.0 | 1879.7                                   | 2707.3 | 135.7                                          | 2548.1 | 17.3                                     | 30.6  | 12.2                                           |    |  |
| 52        | 882     | 352.6     | bd          | 0.97       | 0.39       | 0.055      | 0.0                 | 0.001 | -                      | 0.00                      | 0.24               | 0.00     | 0.09                | 0.03 | 0.35                              | 19.42 | 8.3                            | 18.49                           | 2.20   | 0.00                   | 18.98                           | 0.03   | 0.03                           | 0.00      | 0.45                              | 530804.0 | 36269.9                                  | 4880.8 | 362.9                                          | 4082.7 | 259.3                                    | 143.4 | 10.4                                           |    |  |
| 53        | 882     | 258.7     | 1.5         | 0.99       | 0.22       | 0.059      | 0.0253              | 0.000 | 77.8                   | 3.62                      | 1.21               | 1.40     | 0.49                | 0.11 | 0.02                              | 14.8  | 1.5                            | 15.45                           | 1.36   | 0.01                   | 21.9                            | 0.02   | 0.02                           | 0.46      | 116275.5                          | 3138.8   | 424.9                                    | 17.4   | 974.8                                          | 97.2   | 20.6                                     | 0.8   |                                                |    |  |
| 54        | 882     | 218.9     | 6.06        | 0.97       | 0.77       | 0.056      | 0.0310              | 0.000 | 78.1                   | 8.00                      | 1.69               | 0.78     | 0.18                | 0.06 | 0.01                              | 7.53  | 2.1                            | 21.76                           | 1.05   | 0.01                   | 63.6                            | 0.01   | 0.01                           | 0.53      | 81055.2                           | 10685.0  | 829.8                                    | 45.9   | 2018.8                                         | 187.6  | 240.9                                    | 41.4  |                                                |    |  |
| 55        | 882     | 73.9      | 8.4         | 0.98       | 0.95       | 0.059      | 0.1411              | 0.003 | 79.4                   | 35.71                     | 9.07               | 0.79     | 0.43                | 0.02 | 0.00                              | 5.90  | 2.4                            | 0.00                            | 0.00   | 0.00                   | 79.2                            | 0.00   | 0.00                           | 0.78      | 19971.7                           | 1455.5   | 54.8                                     | 22.1   | 14462.8                                        | 656.3  | 628.4                                    | 10.0  |                                                |    |  |
| 56        | 883     | 304.1     | bd          | 0.99       | 0.21       | 0.064      | 0.0                 | 0.001 | -                      | 0.33                      | 0.99               | nd       | 0.00                | 0.29 | 0.32                              | 34.67 | 5.59                           | 8.30                            | 1.57   | 0.32                   | 37.16                           | 0.29   | 0.29                           | 0.32      | 618285.8                          | 19727.5  | 2716.5                                   | 247.3  | 4000.4                                         | 99.9   | 44.0                                     | 10.8  |                                                |    |  |
| 57        | 883     | 268.1     | 0.2         | 0.99       | 0.18       | 0.065      | 0.0                 | 0.001 | -                      | 0.98                      | 0.30               | nd       | 0.00                | 0.71 | 0.38                              | 46.65 | 6.97                           | 19.49                           | 5.65   | 0.00                   | 0.00                            | 0.00   | 0.71                           | 293503.7  | 45312.4                           | 1749.2   | 198.9                                    | 1920.1 | 21.8                                           | 47.3   | 0.2                                      |       |                                                |    |  |
| 58        | 883     | 249.4     | 2.25        | 0.99       | 0.21       | 0.062      | 0.0017              | 0.000 | 83.3                   | 0.95                      | 0.40               | 0.35     | 0.20                | 0.07 | 0.00                              | 17.44 | 4.61                           | 23.11                           | 2.62   | 0.00                   | 0.00                            | 0.00   | 0.43                           | 372479.5  | 1698.1                            | 4006.6   | 690.7                                    | 2601.8 | 124.0                                          | 104.8  | 3.1                                      |       |                                                |    |  |
| 59        | 883     | 189       | 1.6         | 0.99       | 0.99       | 0.058      | 0.0647              | 0.001 | 83.8                   | 10.94                     | 1.27               | 1.18     | 0.31                | 0.14 | 0.02                              | 15.08 | 1.61                           | 12.20                           | 1.05   | 0.77                   | 88.04                           | 0.02   | 0.02                           | 0.75      | 16892.7                           | 539.0    | 48.9                                     | 0.7    | 18113.5                                        | 452.2  | 626.2                                    | 29.8  |                                                |    |  |
| 510       | 883     | 28        | 30.1        | 0.99       | 0.91       | 0.065      | 0.1596              | 0.003 | 86.6                   | 34.07                     | 0.11               | 0.94     | 0.42                | 0.07 | 0.03                              | 13.49 | 4.44                           | 0.00                            | 0.00   | 0.00                   | 52.79                           | 0.00   | 0.00                           | 2.53      | 6331.1                            | 86.6     | 42.1                                     | 5.0    | 24513.8                                        | 389.5  | 521.7                                    | 8.3   |                                                |    |  |
| 511       | 894     | 118.9     | bd          | 0.98       | 0.96       | 0.060      | 0.0879              | 0.001 | 78.9                   | 2.71                      | 1.01               | 0.27     | 0.14                | 0.09 | 0.01                              | 6.4   | 2.1                            | 64.86                           | 5.86   | 0.48                   | 76.3                            | 0.01   | 0.01                           | 0.77      | 185531.9                          | 845.8    | 2421.5                                   | 154.4  | 6800.4                                         | 15.4   | 284.8                                    | 7.4   |                                                |    |  |
| 512       | 904     | 179.4     | bd          | nd         | 0.26       | 0.070      | nd                  | nd    | nd                     | nd                        | nd                 | nd       | 0.19                | 0.06 | 0.00                              | 8.47  | 4.05                           | 50.90                           | 4.39   | 0.00                   | 0.00                            | 0.00   | 0.51                           | 426523.5  | 1944.5                            | 4347.9   | 632.0                                    | 6000.2 | 108.9                                          | 233.5  | 8.5                                      |       |                                                |    |  |
| 513       | 904     | 124.0     | 0.25        | nd         | 0.82       | 0.060      | nd                  | nd    | nd                     | nd                        | nd                 | nd       | 0.16                | 0.00 | 0.00                              | 9.06  | 2.62                           | 61.40                           | 7.20   | 1.64                   | 90.52                           | 0.00   | 0.00                           | 1.64      | 153881.6                          | 2806.0   | 562.2                                    | 74.1   | 6435.6                                         | 14.6   | 198.2                                    | 10.3  |                                                |    |  |
| 514       | 906     | 147.1     | bd          | nd         | 0.33       | 0.070      | nd                  | nd    | nd                     | nd                        | nd                 | nd       | 0.32                | 0.07 | 0.28                              | 38.0  | 11.7                           | 16.05                           | 3.63   | 0.28                   | 13.67                           | 0.07   | 0.07                           | 0.32      | 318507.1                          | 1452.0   | 2104.1                                   | 67.1   | 6031.7                                         | 150.6  | 88.7                                     | 14.2  |                                                |    |  |
| 515       | 907     | 130       | 0.44        | 0.97       | 0.25       | 0.110      | 0.0180              | 0.000 | 82.0                   | 11.38                     | 1.80               | 0.32     | 0.30                | 0.10 | 0.23                              | 17.51 | 4.66                           | 12.36                           | 1.23   | 0.23                   | 39.3                            | 0.10   | 0.10                           | 0.32      | 729635.6                          | 3326.3   | 4276.9                                   | 0.0    | 4212.9                                         | 143.4  | 140.6                                    | 8.6   |                                                |    |  |
| 516       | 907     | 9.2       | 209.3       | nd         | nd         | nd         | nd                  | nd    | nd                     | nd                        | nd                 | nd       | nd                  | nd   | nd                                | nd    | nd                             | nd                              | nd     | nd                     | nd                              | nd     | nd                             | nd        | 6250.4                            | 795.7    | 14.8                                     | 4.4    | 994.1                                          | 6.8    | 45.9                                     | 5.9   |                                                |    |  |
| 517       | 912     | 89.8      | 1.44        | 0.97       | 0.38       | 0.090      | 0.1227              | 0.002 | 80.2                   | 11.86                     | 1.90               | 2.07     | 0.34                | 3.06 | 1.17                              | 32.50 | 12.38                          | 87.8                            | 118.00 | 27.80                  | 83.55                           | 118.00 | 27.80                          | 39.3      | 789262.1                          | 21586.2  | 9472.8                                   | 647.3  | 3077.8                                         | 7.0    | 246.6                                    | 5.0   |                                                |    |  |
| 518       | 912     | 4.7       | 204.5       | nd         | nd         | nd         | nd                  | nd    | nd                     | nd                        | nd                 | nd       | nd                  | nd   | nd                                | nd    | nd                             | nd                              | nd     | nd                     | nd                              | nd     | nd                             | nd        | 15921.1                           | 508.0    | 44.3                                     | 10.8   | 2589.8                                         | 152.7  | 110.7                                    | 2.8   |                                                |    |  |
| 519       | 892     | 143.7     | bd          | 0.76       | 0.11       | 0.090      | 0.0337              | 0.000 | 71.0                   | 1.79                      | 0.356              | 0.16     | 0.05                | 0.72 | 0.19                              | 12.69 | 1.12                           | 20.47                           | 1.63   | 0.30                   | 0.00                            | 0.00   | 0.20                           | 1010946.4 | 4608.8                            | 291021.5 | 3178.2                                   | 2936.5 | 119.9                                          | 49.8   | 5.8                                      |       |                                                |    |  |
| 520       | 906     | 92.2      | 0.46        | nd         | 0.11       | 0.080      | nd                  | nd    | nd                     | nd                        | nd                 | nd       | 2.37                | 0.54 | 0.41                              | 53.8  | 4.2                            | 15.34                           | 4.88   | 0.41                   | 0.00                            | 0.00   | 0.11                           | 351334.8  | 9609.0                            | 1556.3   | 835.7                                    | 6529.0 | 59.3                                           | 204.0  | 18.5                                     |       |                                                |    |  |
| 521       | 917     | 139.2     | bd          | nd         | 0.1        | 0.100      | nd                  | nd    | nd                     | nd                        | nd                 | nd       | 0.76                | 0.25 | 0.13                              | 27.5  | 4.8                            | 2.63                            | 0.36   | 0.13                   | 0.00                            | 0.00   | 0.20                           | 969128.0  | 8836.2                            | 759.6    | 80.2                                     | 2725.7 | 0.0                                            | 32.7   | 0.7                                      |       |                                                |    |  |
| Average   |         |           |             |            |            |            |                     | 0.049 | 80.1                   | 8.8                       | 0.8                |          | 0.5                 |      | 20.4                              |       |                                | 8.7                             |        | 35.0                   |                                 |        | 26.0                           |           |                                   |          |                                          |        |                                                |        |                                          |       |                                                |    |  |
| STD       |         |           |             |            |            |            |                     | 0.057 | 4.2                    | 11.9                      | 0.6                |          | 0.8                 |      | 14.4                              |       |                                | 2.2                             |        | 35.4                   |                                 |        | 24.2                           |           |                                   |          |                                          |        |                                                |        |                                          |       |                                                |    |  |

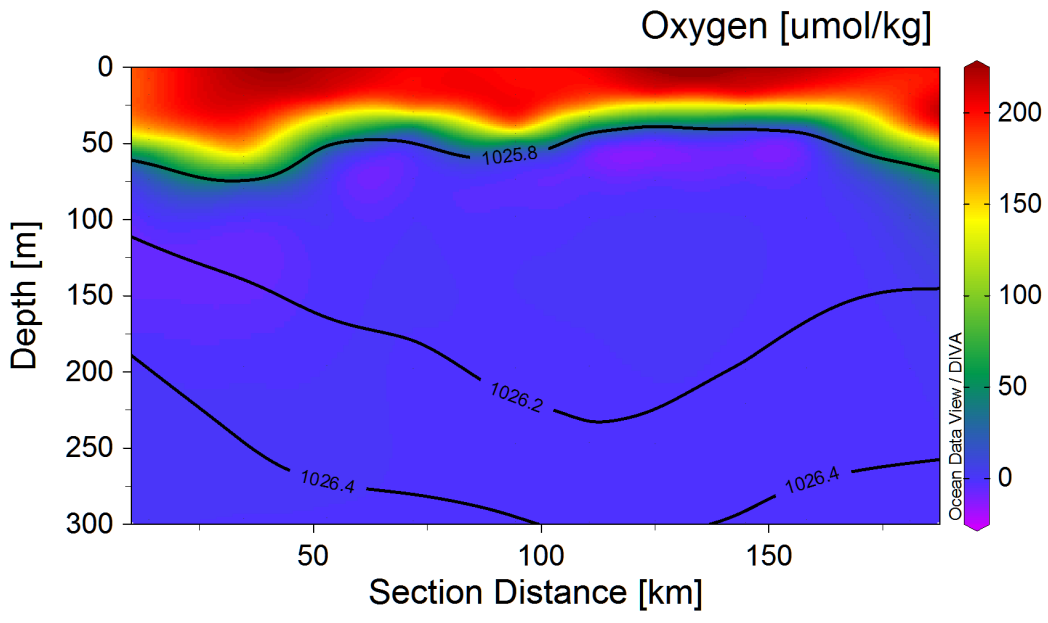

20

**Figure S1:** Oxygen and density contours plot from CTD data.

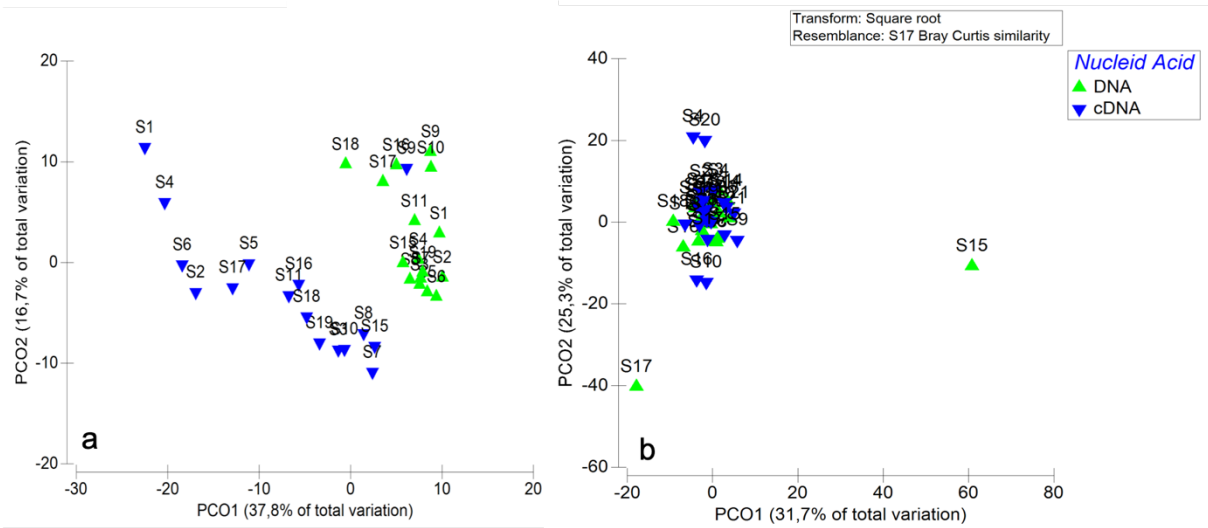

25 **Figure S2:** Principle component analysis of *amoA* DNA and cDNA (a) and *nirS* DNA and cDNA (b).



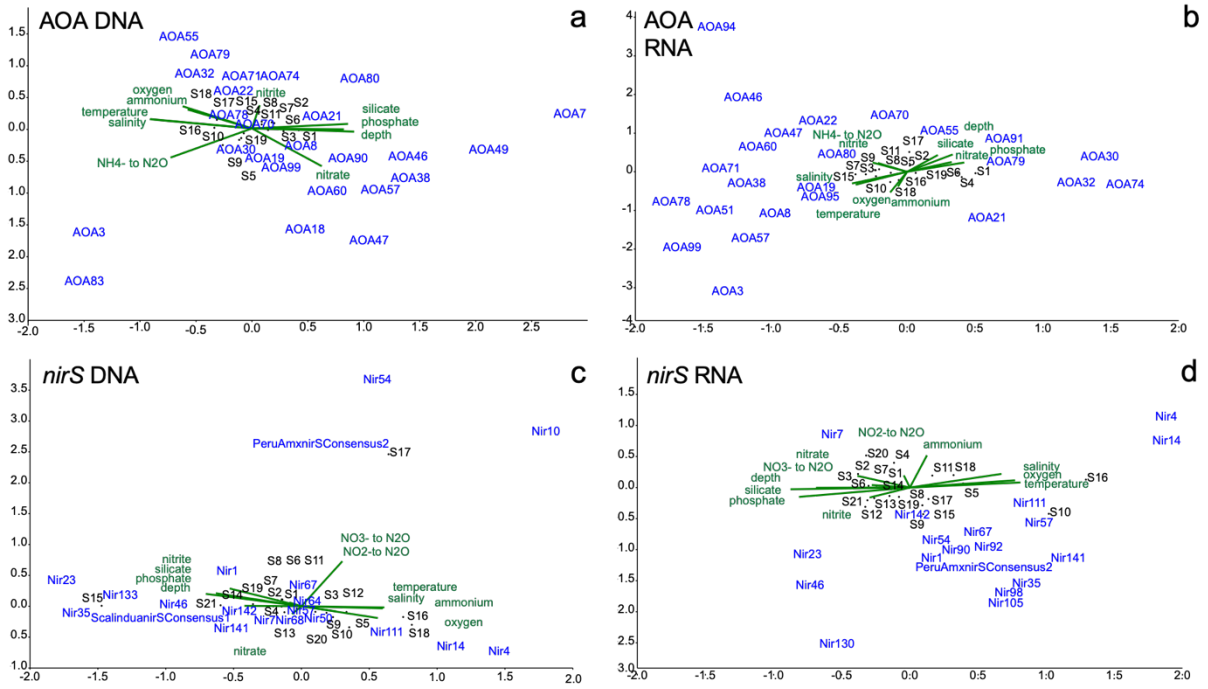

**Figure S4:** Triplot of Canonical Correspondence Analysis showing the archetype composition as a response to the environmental parameters. Upper panel shows *amoA* (a,b) and lower panel *nirS* archetypes (c,d). On the right is the DNA (a,c) and on the left is the cDNA (b,d).

35



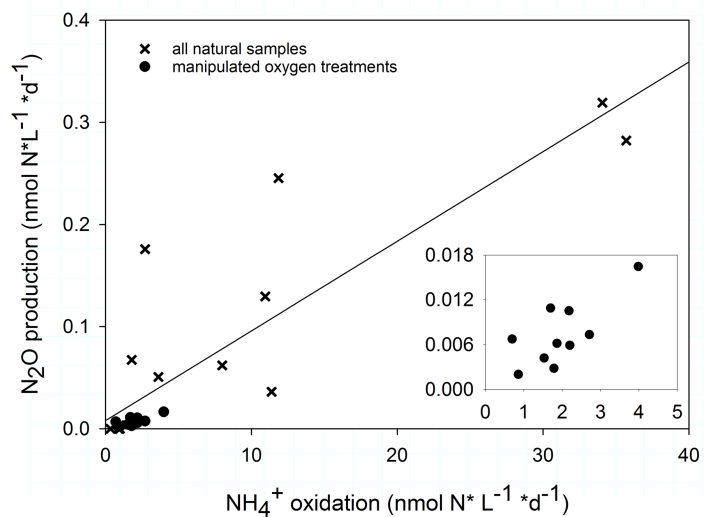

40 **Figure S5:** Scatter plot of AO versus N<sub>2</sub>O production from NH<sub>4</sub><sup>+</sup>, zoom up shows manipulated treatments with small AO rates. Linear fit with  $y = 0.0088x + 0.0080$   $R^2 = 0.75$ ,  $p < 0.0001$ .

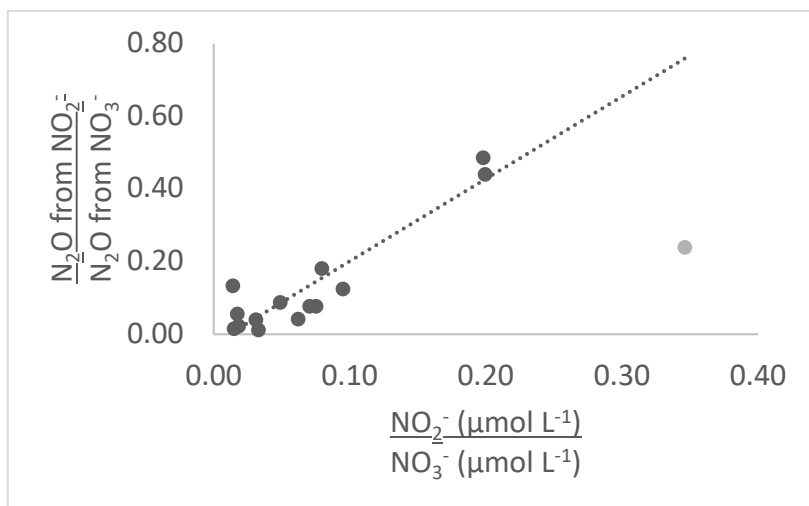

45 **Figure S6:** Scatter plot of the ratio of  $\text{N}_2\text{O}$  production rates from  $\text{NO}_2^-$  and that from  $\text{NO}_3^-$  plotted against ratio of  $\text{NO}_2^-$  and  $\text{NO}_3^-$  concentrations. Linear fit with  $y = 2.267 x - 0.0254$   $R^2 = 0.86$ ,  $p < 0.0001$
