# Supplementary material for: Regulation of nitrous oxide production in low oxygen waters off the coast of Peru
Source: Copernicus journal article supplement (doi:10.5194/bg-2019-476), 2019-12-09
Supplement: Supplementary file [file bg-2019-476-RC4-supplement.pdf]

## Response to Authors from Ref #2

(Reviewer replies in highlighted text)

The authors have done a good job at incorporating and considering comments. I suggest publication after some very minor revisions/additions that I have added where necessary to their replies. Replies that have sufficiently addressed the issues have been omitted from this document.

### *General comments:*

Can you be sure that there is no DNRA occurring in your experiments – in particular given the Lam et al. 2009 ‘Revising the N cycle...’ paper also off the Peruvian coast. The presence of DNRA would complicate your isotope pairing experiments with  $^{15}\text{NO}_3^-$  and  $^{15}\text{NO}_2^-$  by transferring  $^{15}\text{N}$  into the  $\text{NH}_4^+$  pool and you would get ‘hybrid’  $\text{N}_2\text{O}$  of  $^{15}\text{nh}_4^+$  and  $^{15}\text{no}_2^-$  forming  $^{46}\text{N}_2\text{O}$  and be wrongly assigned. DNRA would also potentially dilute your  $^{15}\text{NH}_4^+$  pool with  $^{14}\text{N}$  from background  $\text{NO}_3^-$  and alter the assumed 99% labelling in these experiments. I realise the contribution of AO to  $\text{N}_2\text{O}$  production is small relative to denit, but the artefacts of DNRA on the rates/data should be discussed as it could lead to some  $\text{N}_2\text{O}$  from AO being ‘hidden’.

**The reviewer raises a very important point and no, we cannot be sure that the occurrence of DNRA is impacting our results. We added this consideration to the manuscript in line 216 - 232. “Nevertheless, this assumption brings some initial considerations which need to be accounted for. There is a potential for overestimating hybrid  $\text{N}_2\text{O}$  production in  $^{15}\text{NO}_2^-$  incubations by 5% in samples with high  $\text{NO}_3^-$  reduction rates. But in incubations from anoxic depths with high  $\text{NO}_3^-$  reduction rates, no hybrid  $\text{N}_2\text{O}$  production is found at all. For example, accounting for a decrease in  $f\text{N}$  of the  $\text{NO}_3^-$  pool by active  $\text{NO}_2^-$  oxidation, the process with highest rates (Sun et al. 2017), had an effect of only  $\pm 0.2\%$  on the final rate estimate. The presence of DNRA complicates  $^{15}\text{N}$ -labelling incubations because it can change  $f$  in all three tracer experiments. In the vicinity of DNRA in  $^{15}\text{NO}_3^-$  incubations,  $^{15}\text{NO}_2^-$  and  $^{15}\text{NH}_4^+$  can be produced from  $^{15}\text{NO}_3^-$  which can contribute to  $^{46}\text{N}_2\text{O}$  production by AO. Even when a maximum DNRA rate (20 nM d<sup>-1</sup> in Lam et al. 2009) is assumed to produce 0.02 nM  $^{15}\text{NH}_4^+$  in 24 h with all of it being oxidized to  $\text{N}_2\text{O}$  (max.  $\text{N}_2\text{O}$  production from AO 0.16 nM d<sup>-1</sup>, this study), its contribution to  $^{46}\text{N}_2\text{O}$  production is likely minor and within the standard error of  $\text{N}_2\text{O}$  production rates from  $\text{NO}_3^-$ . Hence an overestimation of the  $\text{N}_2\text{O}$  production rates is unlikely. The same applies in incubations with  $^{15}\text{N}$ - $\text{NO}_2^-$  when DNRA produces  $^{15}\text{NH}_4^+$ , additional  $^{46}\text{N}_2\text{O}$  can be produced with a hybrid mechanism by AO not accounted for in the present rate calculations. In  $^{15}\text{NO}_2^-$  incubations with high starting  $f$  ( $>0.7$ ) the production of  $^{14}\text{NO}_2^-$  by  $\text{NO}_3^-$  reduction (which decreases  $f$ ) leads to an underestimation by max. 9%, whereas in incubations with a low  $f$  ( $<0.3$ ) the effect is less with max. 3 % underestimation of  $\text{N}_2\text{O}$  production rates. In  $^{15}\text{NH}_4^+$  incubations ( $f>0.9$ ), max. DNRA rate would lead to an underestimation of 3.5 %.”**

Thanks, I realise it will be a small % but important to acknowledge. It would also be good to add a sentence in the discussion to suggest that DNRA (& anammox) are measured in addition in future work to rule out potential artefacts – there are now several (sediment) papers on the artefacts of the cooccurrence of  $\text{NO}_3^-$  reducing processes on the IPT assumptions.

I think you just need to change “In the vicinity of DNRA in  $^{15}\text{NO}_3^-$  incubations...” to “In relation to DNRA in  $^{15}\text{NO}_3^-$  incubations...”

### **Specific comments:**

Section 2.1: As with other papers with many sites, sampling points and manipulation experiments a written methods text quickly becomes very complicated with different additions, concentrations, replicates, time points etc. I think as a result of the text being quite confusing some information has been missed/is unclear. Adding a table of experiments, stations, variables, sampling routine (e.g. time points), number of replicates, other factors (e.g. whether  $\text{O}_2$  was measured in vials) would be informative/helpful to readers who are interested in comparing/replicating experiments.

It is correct, that such set ups can get confusing very quickly, but in table 1 stations, depths, measured variables and the kind of experiment performed are given. However, we added one column with the kind of tracer addition we did. The replicates and time points did not vary between experiments and hence is only stated in the text. We only measured oxygen in one bottle with each incubation per depth or treatment, which was also consistent and written in the text line 168/169.

My apologies – I missed this table but think the added information now makes it clearer.

Line 145 (O<sub>2</sub> manipulation experiments): Why was such a ‘coarse’ O<sub>2</sub> range used compared to previous studies which use O<sub>2</sub> manipulations generally below 1-2 μM (e.g. Dalsgaard et al 2014, Bristow et al 2016)?

In Bristow et al. 2016 a and b the maximal oxygen concentration in their manipulation experiments was 10 μM and 20 μM dissolved oxygen, so we are not quite sure what the referee means. Dalsgaard et al 2014 performed a really nice microcosm experiment, where oxygen concentrations were monitored online in the flask they subsampled. In our case, each time point was a separate bottle making it impossible to use such an approach. For the experimental design in this study, it was important to choose oxygen levels where we can be sure that oxygen concentrations are different enough from each other that we can differentiate the two treatments (f.e. 100 nM and 200 nM would be tricky to tell apart with our standard deviations of 180 nM and 240 nM over 24h). We added a plot of oxygen over time into the supplements Figure S1.

I meant that in Bristow et al. and Dalsgaard et al that a lot of their measurements are concentrated below 1-2 μM oxygen and fewer concentrations in the ‘higher’ 10-20 μM range... i.e. focusing on the concentrations where the inhibition/regulation really ‘happens’. But I understand the reasons you describe above given the standard deviations of O<sub>2</sub> measurements and without more sensitive sensors it would be difficult to designate concentrations, I agree. I appreciate that Dalsgaard et al do have a nice reactor/microcosm set up which I realise is very specialised for precisely these experiments and with larger volumes than the serum vials – also that it is a lot of work with these types of experiments. I think it would still be good to add a sentence/statement as to why ‘your’ oxygen concentrations were chosen (e.g. given the reasons above, SD in measurements etc) if possible.

Line 466: In relation to the ‘Unchanged N<sub>2</sub>O production with higher O<sub>2</sub> levels in NO<sub>3</sub>- treatments...’ sentence: Can anoxic niches be ruled out in these experiments? You do note the sampling being during low upwelling and chl period but the settling of small particulates during experiments may create anoxic/low O<sub>2</sub> zones to sustain anaerobic processes.

**Anoxic micro niches can never be fully ruled out, if not investigated. The Chlorophyll concentrations were in deed low for an upwelling area, max 5 mg/m<sup>3</sup>, but on average 1 mg/m<sup>3</sup> and less. Figure 1, map of the study site was adjusted with Chlorophyll concentrations. The treatment was identical between depth profile samples and manipulation samples, so if the particles settle, they would settle in all of the bottles and create microniches in the samples from the depth profile as well. There is no plausible explanation why more anoxic micro niches should be in the oxygen manipulations compared to the others.**

But if there is the same amount of particles in all vials/O<sub>2</sub> manipulations then there is potential for some anoxic processes to be ‘unaffected’ by O<sub>2</sub> additions - with some changes in anoxic microsite volume with O<sub>2</sub> diffusion into particles. I realise this is hard to rule out – especially as you collect small particles from the water column to use, indicating that they are there. I think it would be important to write something shortly about why you consider it unlikely that any (significant) anoxic niches occur.

Line 477: How can you be sure none of the N<sub>2</sub>O was consumed without further measurements (e.g. 15N-N<sub>2</sub>)? Production may just be much faster than consumption.

**We are not able to say anything about N<sub>2</sub> production, we can only assume. We added sufficient amounts of <sup>44</sup>N<sub>2</sub>O carrier prior to the incubation to trap <sup>15</sup>N-labelled N<sub>2</sub>O. If N<sub>2</sub>O reduction is taking place at high rates, we would see a decrease in the N<sub>2</sub>O pool over time. A plot with the mass 44, 45 and 46 over time was added to the supplements (Figure S2).**

**Shortly suggest/indicate benefits of also measuring other end products (e.g. <sup>15</sup>N-N<sub>2</sub> and maybe also <sup>15</sup>NH<sub>4</sub><sup>+</sup> from DNRA) in the text (i.e. how does the ‘efficiency’ of denit change with changing O<sub>2</sub>)**

Line 521: This is a bit of an oversimplification - because something is below detection doesn't necessarily mean nothing is happening, more likely a tight coupling between consumption and production (e.g. see Figure 4 in Klawonn et al 2019 and Figure 3 in Olofsson et al 2019 references). Could there be a dilution of your <sup>15</sup>NH<sub>4</sub><sup>+</sup> pool to consider due to rapid cryptic cycling on shorter scales than your experiments? Ideally <sup>15</sup>NH<sub>4</sub><sup>+</sup> and total NH<sub>4</sub><sup>+</sup> would be followed through the time series to check for dilution effects. Both show very rapid NH<sub>4</sub><sup>+</sup> turnover (within ~5h) in oligotrophic waters

**The <sup>15</sup>NH<sub>4</sub><sup>+</sup> substrate was not measured on the GC-IRMS because high <sup>15</sup>N label/ almost pure tracer is always problematic to analyze. We added the possibility of an overestimation of hybrid production to the method section line 217 and rephrased the wording here to (line 573-575) “Even though, *in situ* NH<sub>4</sub><sup>+</sup> is below detection in almost all water depths (*f* > 0.9), there remains the potential for <sup>15</sup>NH<sub>4</sub><sup>+</sup> pool dilution by remineralization and/or DNRA during ~~during~~ the incubation. Despite ~~below NH<sub>4</sub><sup>+</sup> concentrations, detection limit~~ studies have shown fast turnover for NH<sub>4</sub><sup>+</sup> (Klawonn et al. 2019)... However/thus”**

**Some kind of ‘conclusion’ is needed at the end of the last sentence in relation to your study. Papers referring to ‘cryptic’ biogeochemical cycling in ODZ waters would also be nice to include in relation to ‘hidden’ processes.**
